# Supplementary material for: A Novel Nutraceuticals Mixture Improves Liver Steatosis by Preventing Oxidative Stress and Mitochondrial Dysfunction in a NAFLD Model
Source: MDPI journal article supplement (doi:10.3390/nu13020652), 2021-02-17
Supplement: s1 [file s1]

*Article*

# A Novel Nutraceuticals Mixture Improves Liver Steatosis by Preventing Oxidative Stress and Mitochondrial Dysfunction in a NAFLD Model

Moris Sangineto <sup>1,†</sup>, Vidyasagar Naik Bukke <sup>1,†</sup>, Francesco Bellanti <sup>2</sup>, Rosanna Tamborra <sup>1</sup>, Archana Moola <sup>1</sup>, Loren Duda <sup>3</sup>, Rosanna Villani <sup>1</sup>, Antonino Davide Romano <sup>1</sup> and Gaetano Serviddio <sup>1,\*</sup>

<sup>1</sup> C.U.R.E. (University Center for Liver Disease Research and Treatment), Liver Unit, Department of Medical and Surgical Sciences, University of Foggia, 71122 Foggia, Italy; moris.sangineto@unifg.it (M.S.); sagar.niper@gmail.com (V.N.B.); rosanna.tamborra@unifg.it (R.T.); archana.moola@unifg.it (A.M.); rosanna.villani@unifg.it (R.V.); antoninodavide.romano@unifg.it (A.D.R.)

<sup>2</sup> Internal Medicine, Department of Medical and Surgical Sciences, University of Foggia, 71122 Foggia, Italy; francesco.bellanti@unifg.it

<sup>3</sup> Pathology Unit, Department of Clinical and Experimental Medicine, University of Foggia, 71122 Foggia, Italy; segreteriamedint@libero.it

\* Correspondence: gaetano.serviddio@unifg.it; Tel.: +39-0881-736007

† These authors contributed equally to this work.

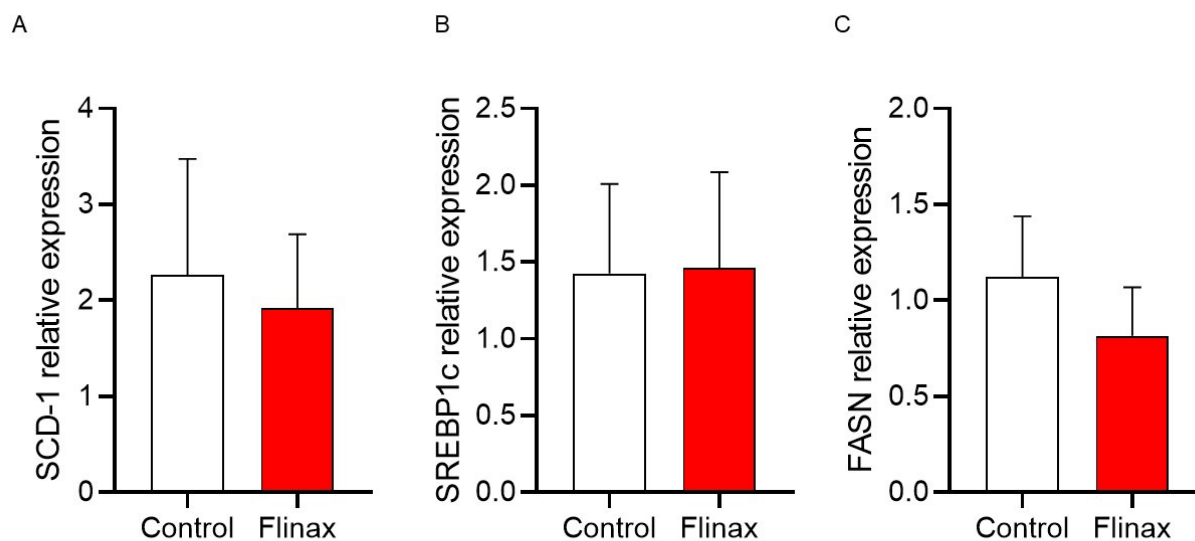

**Figure S1. Expression of genes involved in fatty acids synthesis.** (A–C) mRNA levels of SCD-1, SREBP1c and FASN fold over control (Control = n6; Flinax = n6). Data are expressed in mean  $\pm$  SEM; SCD-1, stearoyl-CoA-desaturase-1; SREBP1c, Sterol regulatory element-binding transcription factor 1-c; FASN, fatty acids synthetase. Control: rats treated with chow-diet; Flinax: rats treated with chow-diet+Flinax.

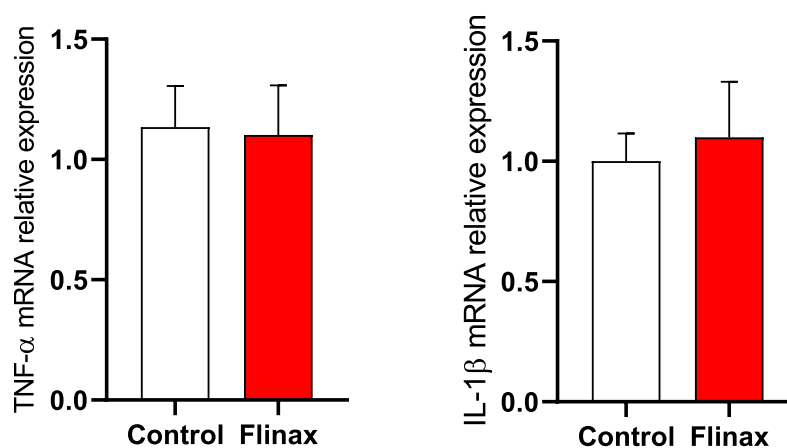

**Figure S2. Cytokines gene expression.** No difference was observed in the expressions of TNF- $\alpha$  and IL-1 $\beta$ , while IL-6 was not expressed in the model. Control: rats treated with chow-diet; Flinax: rats treated with chow-diet+Flinax.
